# Supplementary material for: Assessing an effective undergraduate module teaching applied bioinformatics to biology students
Source: PubMed Central journal article supplement (PMC5764237; doi:10.1371/journal.pcbi.1005872), 2018-01-11
Supplement: pcbi.1005872.s004.pdf [file pcbi.1005872.s004.pdf]

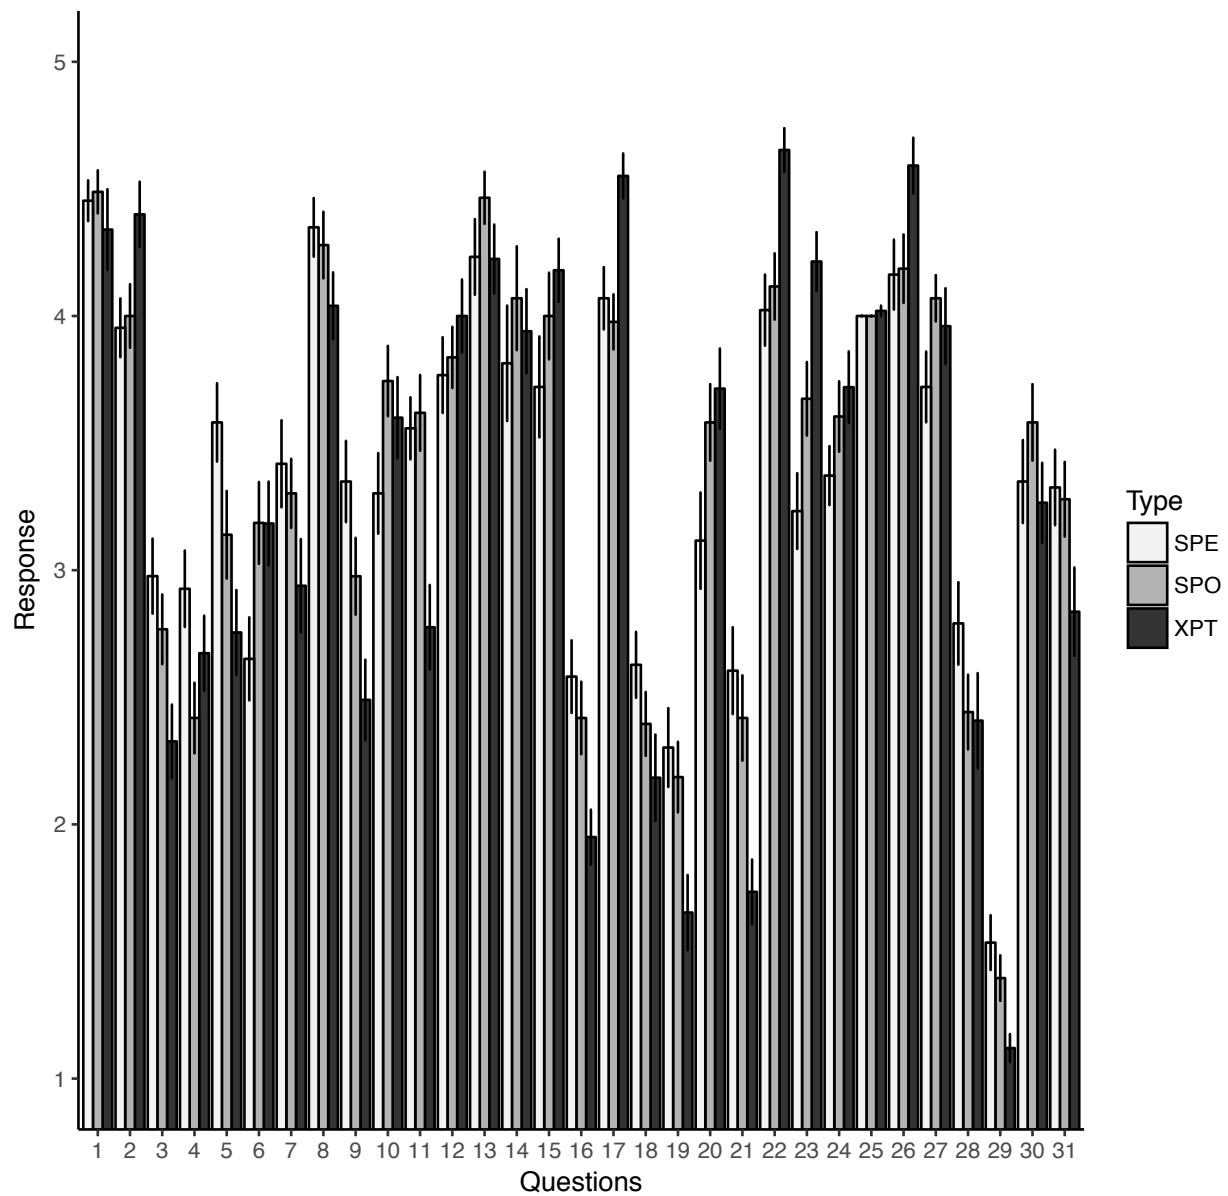

**S4 Supplemental Fig:** Student and expert responses to all questions on the questionnaire. SPE = student response pre-module, SPO = student response post module, XPT = expert response. N (students) = 51, N (experts) = 50. Unless reported in Figure 3 (which shows a subset of these data) student responses compared to those of the experts did not differ between pre- and post-module testing. This figure shows responses to all questions, including those where experts did not reach consensus (see Methods and Results).
